# Supplementary material for: Multimorbidity in Patients with Chronic Liver Disease: A Population-Based Study in the EpiChron Cohort, Spain
Source: MDPI journal article supplement (doi:10.3390/jcm13237198), 2024-11-27
Supplement: s1 [file s1]

**Table S1.** List of 110 chronic conditions or Expanded Diagnostic Clusters (EDC) included and analyzed in the study.

| <b>EDC</b> | <b>Description</b>                                 |
|------------|----------------------------------------------------|
| ADM02      | Surgical aftercare                                 |
| ALL03      | Allergic rhinitis                                  |
| ASMA       | Asthma                                             |
| ALL06      | Disorders of the immune system                     |
| IHD        | Ischemic heart disease                             |
| CAR04      | Congenital heart disease                           |
| CAR05      | Congestive heart failure                           |
| CAR06      | Cardiac valve disorders                            |
| CAR07      | Cardiomyopathy                                     |
| CAR09      | Cardiac arrhythmia                                 |
| CAR10      | Generalized atherosclerosis                        |
| CAR11      | Disorders of lipid metabolism                      |
| HTA        | Arterial hypertension                              |
| CAR16      | Cardiovascular disorders, other                    |
| EAR08      | Deafness, hearing loss                             |
| END02      | Osteoporosis                                       |
| END04      | Hypothyroidism                                     |
| END05      | Other endocrine disorders                          |
| DIAB       | Diabetes                                           |
| EYE02      | Blindness                                          |
| EYE03      | Retinal disorders (excluding diabetic retinopathy) |
| EYE06      | Cataract, aphakia                                  |
| EYE08      | Glaucoma                                           |
| EYE13      | Diabetic retinopathy                               |
| FRE03      | Endometriosis                                      |
| FRE12      | Utero-vaginal prolapse                             |
| GAS02      | Inflammatory bowel disease                         |
| GAS05      | Chronic liver disease                              |
| GAS08      | Gastroesophageal reflux                            |
| GAS09      | Irritable bowel syndrome                           |
| GAS10      | Diverticular disease of colon                      |
| GAS12      | Chronic pancreatitis                               |
| GAS13      | Lactose intolerance                                |
| GSU06      | Chronic cystic disease of the breast               |
| GSU08      | Varicose veins of lower extremities                |
| GSU11      | Peripheral vascular disease                        |
| GSU13      | Aortic aneurysm                                    |
| GSU15      | Alimentary or excretory surgical openings          |
| GTC01      | Chromosomal anomalies                              |
| GTC02      | Inherited metabolic disorders                      |
| GUR01      | Vesicoureteral reflux                              |

|          |                                                |
|----------|------------------------------------------------|
| GUR03    | Hypospadias, other penile anomalies            |
| GUR04    | Prostatic hypertrophy                          |
| GUR09    | Renal calculi                                  |
| GUR10    | Prostatitis                                    |
| HEM01    | Hemolytic anemia                               |
| HEM02    | Iron deficiency, other deficiency anemias      |
| HEM03    | Thrombophlebitis                               |
| HEM05    | Aplastic anemia                                |
| HEM06    | Deep vein thrombosis                           |
| HEM07    | Hemophilia, coagulation disorder               |
| HEM08    | Hematologic disorders, other                   |
| HEM09    | Sickle cell disease                            |
| INF01    | Tuberculosis infection                         |
| INF04    | HIV, AIDS                                      |
| CANCER   | Cancer                                         |
| ARTRITIS | Arthritis                                      |
| MUS06    | Kyphoscoliosis                                 |
| MUS07    | Congenital hip dislocation                     |
| MUS11    | Congenital anomalies of limbs, hands, and feet |
| MUS13    | Cervical pain syndromes                        |
| MUS14    | Low back pain                                  |
| NUR03    | Peripheral neuropathy, neuritis                |
| NUR05    | Cerebrovascular disease                        |
| NUR06    | Parkinson's disease                            |
| NUR07    | Seizure disorder                               |
| NUR08    | Multiple sclerosis                             |
| NUR09    | Muscular dystrophy                             |
| NUR12    | Quadriplegia and paraplegia                    |
| NUR16    | Spinal cord injury/disorders                   |
| NUR17    | Paralytic syndromes, other                     |
| NUR18    | Cerebral palsy                                 |
| NUR19    | Developmental disorder                         |
| NUR21    | Neurologic disorders, other                    |
| NUR24    | Dementia                                       |
| NUR26    | Autism Spectrum Disorder                       |
| NUT03    | Obesity                                        |
| PSY01    | Anxiety, neuroses                              |
| PSY02    | Substance use                                  |
| PSY05    | Attention deficit disorder                     |
| PSY07    | Schizophrenia and affective psychosis          |
| PSY08    | Personality disorders                          |
| PSY09    | Depression                                     |
| PSY13    | Adjustment disorder                            |
| PSY14    | Psychosocial disorders of childhood            |
| PSY15    | Eating disorder                                |
| PSY16    | Impulse control                                |

|       |                                             |
|-------|---------------------------------------------|
| PSY17 | Psycho-physiologic and somatoform disorders |
| PSY19 | Sleep disorders of nonorganic origin        |
| PSY20 | Major depression                            |
| REC01 | Cleft lip and palate                        |
| REC03 | Chronic ulcer of the skin                   |
| REN01 | Chronic renal failure                       |
| REN04 | Nephritis, nephrosis                        |
| REN05 | Renal disorders, other                      |
| REN06 | End stage renal disease                     |
| RES03 | Cystic fibrosis                             |
| RES04 | Emphysema, chronic bronchitis, COPD         |
| RES06 | Sleep apnea                                 |
| RES08 | Pulmonary embolism                          |
| RES09 | Tracheostomy                                |
| RES11 | Respiratory disorders, other                |
| RES13 | Chronic respiratory failure                 |
| RHU01 | Autoimmune and connective tissue diseases   |
| RHU02 | Gout                                        |
| RHU03 | Arthropathy                                 |
| SKN02 | Dermatitis and eczema                       |
| SKN12 | Psoriasis                                   |
| SKN13 | Disease of hair and hair follicles          |
